# Supplementary material
Source: publisher figshare collection journal article supplement (https://geolsoc.figshare.com/ndownloader/files/5424734)
Supplement: Supplementary file 1 [file 5424734]

Site,Age,Nannofossils dating: Tamar Gavtadze,Mollusks dating: Sophio Khutsishvili,"Ostracods, Foraminifers dating: Laura Phophkhadze",,,,,
GE01,Lower Sarmatian,"Calcidiscus leptoporus, C. macinterei, Umbilicosphaera sibogae,  Reticulofenestra pseudoumbilica, R. galida, Sphenolithus neoabies, Isthmolithus recurvus, Cyclicargolithus floridanus, Reticulofenestra bisecta, Sphenolithus moriformis, Eiffelithus turrisseiffelii, Microrhabdulus decoratus, Lucianorhabdus cayeuxii, Stradneria crenulata, Micula decussata, Watznaueria barnesa.",,,,,,,
GE02,Sarmatian,,,,,,,,
GE03,Lower Sarmatian,,"Lower Sarmatian, mollusks",,,,,,
GE04,Lower Sarmatian,,"Lower Sarmatian, mollusks",,,,,,
GE05,~Bartonian-lower Priabonian,"NP 18  zone. Chiasmolithus oamaruensis: Zygrhabithus bijugatus,Cyclicargolithus floridanus, Coccolithus eopelagicus, C. pelagicus, C. formosus, Chiasmolithus oamaruensis, Reticulofenestra coenura, R. bisecta, R. umbilica, Sphenolithus moriformis, S. radians, Lanternitus minutus,  Zygrhablithus bijugatus, Pontosphaera multiphora, Micula decussata, Microrhabdulus decoratus,  Watznaueria barnesa.",,,,,,,
GE06,Eocene,"Markalius inversus, Coccolithus pelagicus, C. formosus, Toweius crassus, T.eminens, T. pertusus, T. seratus, Transversopontis pulcheroides,  T. obliquipons, Helicosphaera seminulum, H. lophota, Sphenolithus moriformis, S. primus, Rhabdosphaera pseudomorionum, Zygrhablithus bijugatus, Lucianorhabdus cayeuxii Micula decussata, Watznaueria barnesae, Cyclococcolithus robustus, Fasciculithus tympaniformis.",,,,,,,
GE07,Middle Eocene,,,,,,,,
GE08,Upper part of Middle Eocene,"Reticulofenestra scripsae, R. coenura, R. hillae, oamaruensis, Cyclicargolithus floridanus, Coccolithus eopelagicus, Sphenolithus moriformis, Discoaster saipanensis,D. colletii, D. Barbadiensis.",,, ,,,,
GE09,Late Maastrichtian,"CC 25b zone. Lithraphidites quadratus: Lithraphidites quadratus, Eiffelithus turrisseiffelii, Microrhabdulus decoratus, M. concava,  Lucianorhabdus cayeuxii, Lithraphidites praequadratus, Stradneria crenulata, Micula decussata, Watznaueria barnesa, W. biporta,  Arkhangelskiella cymbiformis. ",,,,,,,
GE10,Middle Sarmatian,,,"Middle Sarmatian, Ostracods, Foraminifers, Mollusks",,,,,
GE11,Oligocene-Lower Miocene,,,,,,,,
GE12,Upper part of Middle Eocene,,,,,,,,
GE13,Oligocene,"NP 21. Clausicoccus subdistichus zone: Isthmolithus recurvus, Coccolithus pelagicus, coccolithus eopelagicus, Reticulofenestra bisecta, R. callida, R. gartneri, R. umbilica, R, scripsae, R. dyctioda, R.coenura, Sphenolithus moriformis, S. pseudoradians, Cyclicargolithus floridanus,Rhabdosphaera tenuis, Thoracosphaera opeculata,Zygrhablithus bijugatus, Marcarius inversus, Micula decussata, Watznaueria barnesa, Fasciculithus tympaniformis, F.  alanii, Discoaster multiradiatus.",,,,,,,
GE14,Middle Miocene,,,,,,,,
GE15,Oligocene-Lower Miocene,,,,,,,,
GE16,Middle Eocene,"NP 15. Middle part of Middle Eocene, characteristic complex: Nannotetrina cristata,  Coccolithus eopelagicus, C. pelagicus, C. formosus, Cyclicargolithus floridanus, C. marismontium, Chiasmolithus solithus,  C. grandis,  Reticulofenestra coenura, R. hampdenensis,  Helicosphaera lophota, H. euphratis, Pontosphaera ocellata, P. fibula, Zygrhablithus bijugatus, Discoaster deflandrei, D. arbadiensis, D. wemmelensis, D. saipanensis, D. binodosus, D. distinctus, Triquetrorhabdulus inversus, Braarudosphaera bigelowii,  Sphenolithus moriformis, S. radians, S. intercalaris,  S. anarhopus, Thoracosphaera saxea, Lanternites minutus.",,,,,,,
GE17,Middle Eocene,"NP 15. Middle part of Middle Eocene, characteristic complex:  Nannotetrina fulgens, N. pappii,   Coccolithus eopelagicus, C. pelagicus, C. formosus, Cyclicargolithus floridanus, C. marismontium, Chiasmolithus solithus,  C. grandis,  Reticulofenestra coenura, R. hampdenensis,  Helicosphaera lophota, H. seminulum, Pontosphaera ocellata, P. multiphora, Neococcolithus dubius, Campilosphaera dela,  Biantholithus sparsus, Zygrhablithus bijugatus, Discoaster deflandrei, D. barbadiensis, D. wemmelensis, D. saipanensis, D. binodosus, D. crassus, D. molengraafii,  Scyphosphaera tercisensis,  Triquetrorhabdulus inversus, Braarudosphaera bigelowii,  Sphenolithus moriformis, S. radians, S. spiniger, S. furcatolithoides, S. editus,  S. anarhopus, Thoracosphaera saxea, T. operculata. Redeposited forms: Prediscosphaera cretacea, Lucianorhabdus cayeuxii, Ericsonia subpertosa, Prinsius martinii, Markalius inversus",,,,,,,
GE18,Upper Eocene,"NP 18. Lower part of Upper Eocene,  characteristic complex:  Chiasmolithus oamaruensis, C. grandis,  Coccolithus formosus, Cyclicargolithus floridanus,   Reticulofenestra aff. minutulla, Reticulofenesta aff. minuta, Reticulofenestra aff. haqii, R. insignata, R. coenura, R. hampdenensis, R. hillae, R. umbilica, R. callida, R. reticulata, R. oamaruensis, Helicosphaera compacta,  H. bramlettei, H. rhomba, H. euphratis, Pontosphaera multiphora, P. versa, Transversopontis obliquipons, T. sygmoidalis, Discoaster barbadiensis, D. distinctus, D. tani, D. taninodifer, D. binodosus, D. germanicus, Scyphosphaera tercisensis, Lanternites minutus, Pemma basquensis, Sphenolithus moriformis, S. radians, S. obtusus, S. furcotolithoides, S. predistentus, S. editus, S. celsus,   Zygrhablithus bijugatus, Thoracosphaera saxea, T. operculata. Redeposited forms:   Late Cretaceous forms: (Lucianorhabdus cayeuxii, Micula decussata, Calculites obscurus, Watznaueria barnesa, Uniplanarius sissinghii, Prediscosphaera cretacea, Arkhangelskiella cymbiformis)  Paleocene-Middle Eocene forms: (Chiasmolithus solithus, Nannotetrina cristata, Markalius inversus, Discoaster multiradiatus, Prinsius martinii).",,,,,,,
GE19,Upper Miocene ,"NN 11 - Upper Miocene .  characteristic complex: Amaurolithus primus, Triquetrorhabdulus  farnsworthii, Triquetrorhabdulus sp. ?? Scyphosphaera aff. conica.; Upper Miocene diatoms forms: Cestodiscuscus sp.  Bukry, 1973;  Oligocene - Miocene diatoms forms:  Coscinodiscus sp. C. vetutissimus",,,,,,,
GE20,Upper Eocene,"NP 19 -  Upper part of Upper Eocene,  characteristic complex: Isthmolithus recurvus, Coccolithus eopelagicus, C. pelagicus, C. formosus, Cyclicargolithus floridanus, Reticulofenestra aff. minutula,  R. aff. minuta,  R. aff. haqii, R. callida, R. bisecta, R. umbilica, R. hillae, R. oamaruensis, R. coenura, Dictyococcites dictyodus,Helicosphaera compacta, H. bramlettei, Transversopontis obliquipons, T. latus, Clausicoccus subdistichus,  Zygrhablithus bijugatus, Lanternites minutus, Discoaster saipanensis, D. barbadiensis, Rhabdosphaera tenuis, Sphenolithus predistentus,  S. radians",,,,,,,
GE21,Upper Miocene ,"NN 11 - Upper Miocene .  characteristic complex: Amaurolithus primus, Triquetrorhabdulus  farnsworthii, Triquetrorhabdulus sp. ?? Scyphosphaera aff. conica.; Upper Miocene diatoms forms: Cestodiscuscus sp.  Bukry, 1973;  Oligocene - Miocene diatoms forms:  Coscinodiscus sp. C. vetutissimus",,,,,,,
GE22,Middle Eocene,,,,,,,,
GE23,Upper Eocene,"NP 18. Lowermost part of Upper Eocene, characteristic complex:  Chiasmolithus oamaruensis, Cyclicargolithus floridanus, Coccolithus eopelagicus, C. formosus,  Reticulofenestra aff. minutula,  R. aff. minuta,  R. aff. haqii, R. callida, R. bisecta, R. umbilica,  Dictyococcites dictyodus,  Zygrhablithus bijugatus, Sphenolithus moriformis, S. radians, Pontosphaera multiohora, Transversopontis obliquipons.",,,,,,,
GE24,Upper Eocene (age derived from nearby site GE23),,,,,,,,
GE25,Middle Eocene,"NP 17 - Uppermost part of Middle Eocene,  Characteristic complex: Reticulofenestra bisecta, R. umbilica, Reticulofenestra aff. minutula,  R. aff. minuta,  R. aff. haqii, R. insignata, R. coenura, R. oamaruensis, R. reticulata, R. hampdenensis, Cyclicargolithus floridanus, C. morismontium,  Chiasmolithus grandis,  Coccolithus formosus,  C. eopelagicus, C. pelagicus,  Helicosphaera compacta, Dictyococcites dictyodus, Pontnsphaera sygmoidalis, Discoaster barbadiensis, D. saipanensis, Triquetrorhabdulus inversus, Sphenolithus moriformis, Zygrhablithus bijugatus, Lanternitus minutus, Thoracosphaera operculata Redeposited forms:   Late Cretaceous - Middle Eocene forms: Calculites obscurus, Reinhardtites anthophorus, Micula decussata, Ellipsolithus macellus, Toweius pertusus, Chiasmolithus solithus,  Nannotetrina fulgens.",,,,,,,
GE26,Oligocene,,,,,,,,
GE27,Upper Eocene,,,,,,,,
GE28,Late Maastrichtian,"CC 25. Late Maastrichtian. characteristic complex:  Watznaueria barnesae, Cyclagelosphaera margerelii, C. brezae, Eiffellithus turriseiffelii, E. eximius, E. gorcae,Chiastozygus amphiphons, Cretarhabdus crenulatus, Calculites obscurus, Broinsonia matalosa, Prediscosphaera cretacea, P. ponticulata,  P. grandis,  Arkhangelskiella cymbiformis, A. confusa,  Zeughrabdotus spiralis, Micula decussata, M. murus, Uniolanarius gothicus, Lucianorhabdus cayeuxii, Braarudosphaera turbinae, B. bigelowii,  Microrhabdulus decoratus,  M.undosus, Lithraphidites carniolensis,  L. serratus, L. praequadratus, L. qadratus,  Biscutum castrorum,  Ceratolithoides indiensis, C. quasiarcuatus, C. aculeus.",,,,,,,
,,Nannofossils dating: Carla M�ller,,,,,,,
AA,late middle to upper Eocene,NP 17,,,,,,,
AB,upper Paleocene,NP 5,,,,,,,
BA,late Santonian?,CC 16-CC 17?,,,,,,,
BB,Eocene (age derived from geological map),,,,,,,,
BD,late middle to upper Eocene,NP 17,,,,,,,
BE,late middle to upper Eocene,NP 17,,,,,,,
BG,late middle to upper Eocene,NP 17,,,,,,,
BH,Upper Eocene,NP 18,,,,,,,
BK,late middle to upper Eocene (lateral equivalent of AA),,,,,,,,
